# Supplementary material
Source: PubMed Central journal article supplement (PMC2790353)
Supplement: kwn229_1.pdf [file kwn229_1.pdf]

## Web Appendix 1

A standard taxonomy of models was used(34), starting from the unconditional means model (Model A), unconditional growth model (Model B), growth model with level-2 controlled effects of demographic factors (Model C), growth model with level-2 controlled effects of demographic factors, adding a squared-age term that would allow the rate of change to vary with time (Model D). In model E, we also added year of birth to allow for secular trends in the intercept and rate of change as well as the curvature by interacting with age-square. In all models, age was centered at 50 years, while education was centered at 16 years. The following equations apply to each of the growth models considered:

-- Web Table 1 about here--

*Notations:*  $Y_{ij}$  is the response variable (BMI or WC) for each individual “i” and age at visit “j”.  $\pi_{0i}$  is the level-1 intercept for individual i;  $\pi_{1i}$  is the level-1 slope for individual i;  $\gamma_{00}$  is the level-2 intercept of the random intercept  $\pi_{0i}$ ;  $\gamma_{10}$  is the level-2 intercept of the slope  $\pi_{1i}$ ;  $Z_{ik}$  is a vector of fixed covariates for each individual i that are used to predict level-1 intercepts and slopes;  $\zeta_{0i}$  and  $\zeta_{1i}$  are level-2 disturbances;  $\varepsilon_{ij}$  is the within-person level-1 disturbance.

Model E’s improvement in fit compared to the simpler models was evaluated using Deviance, AIC and BIC statistics as well as pseudo- $R^2$ . In addition, residuals were plotted against predicted values to assess their normality. Finally, empirical Bayes estimators of BMI and WC at ages 30 through 50, spaced in 5-year periods, were predicted from Model E using the following method, after estimating the random effects ( $(\zeta_{0i} + \varepsilon_{ij})$  for the intercept and  $\zeta_{1i}$  for the slope) for each individual i:

--Web Table 2 about here--

Evaluation of model E in terms of fit to the data indicated that for instance observed BMI at ages ranges between 30 and 40 was highly correlated with predicted values at age 35 ( $r=0.95$ ). The same was observed for all other exposures predicted at each age. In addition, residuals were shown to be random around zero and with comparable accuracy at all values of BMI/WC when plotted against predicted values at each age. Moreover, correlations between empirical bayes estimators of slopes and intercepts were small ( $r=0.04$  for WC and 0.31 for BMI) indicating that initial status was not strongly or linearly associated with rate of change over time.

Web Table 1

| Model | Level-1 model                                             | Level-2 model                                                                                                                                           | Composite model                                                                                                                                                          |
|-------|-----------------------------------------------------------|---------------------------------------------------------------------------------------------------------------------------------------------------------|--------------------------------------------------------------------------------------------------------------------------------------------------------------------------|
| A     | $Y_{ij} = \pi_{0i} + \varepsilon_{ij}$                    | $\pi_{0i} = \gamma_{00} + \zeta_{0i}$                                                                                                                   | $Y_{ij} = \gamma_{00} + (\zeta_{0i} + \varepsilon_{ij})$                                                                                                                 |
| B     | $Y_{ij} = \pi_{0i} + \pi_{1i}Age_{50} + \varepsilon_{ij}$ | $\pi_{0i} = \gamma_{00} + \zeta_{0i}$<br><br>$\pi_{1i} = \gamma_{10} + \zeta_{1i}$                                                                      | $Y_{ij} = \gamma_{00} + \gamma_{10}Age_{50} + (\zeta_{0i} + \zeta_{1i}Age_{50} + \varepsilon_{ij})$                                                                      |
| C     | $Y_{ij} = \pi_{0i} + \pi_{1i}Age_{50} + \varepsilon_{ij}$ | $\pi_{0i} = \gamma_{00} + \sum_{k=1}^7 \gamma_{0k}Z_{ik} + \zeta_{0i}$<br><br>$\pi_{1i} = \gamma_{10} + \sum_{k=1}^7 \gamma_{1k}Z_{ik} + \zeta_{1i}$    | $Y_{ij} = \gamma_{00} + \sum_{k=1}^7 \gamma_{0k}Z_{ik} + \gamma_{10} + \sum_{k=1}^7 \gamma_{1k}Z_{ik}Age_{50} + (\zeta_{0i} + \zeta_{1i}Age_{50} + \varepsilon_{ij})$    |
| D     | $Y_{ij} = \pi_{0i} + \pi_{1i}Age_{50} + \varepsilon_{ij}$ | $\pi_{0i} = \gamma_{00} + \sum_{k=1}^7 \gamma_{0k}Z_{ik} + \zeta_{0i}$<br><br>$\pi_{1i} = \gamma_{10} + \sum_{k=1}^8 \gamma_{1k}Z_{ik} + \zeta_{1i}$    | $Y_{ij} = \gamma_{00} + \sum_{k=1}^7 \gamma_{0k}Z_{ik} + \gamma_{10} + \sum_{k=1}^8 \gamma_{1k}Z_{ik}Age_{50} + (\zeta_{0i} + \zeta_{1i}Age_{50} + \varepsilon_{ij})$    |
| E     | $Y_{ij} = \pi_{0i} + \pi_{1i}Age_{50} + \varepsilon_{ij}$ | $\pi_{0i} = \gamma_{00} + \sum_{k=1}^8 \gamma_{0k}Z_{ik} + \zeta_{0i}$<br><br>$\pi_{1i} = \gamma_{10} + \sum_{k=1}^{10} \gamma_{1k}Z_{ik} + \zeta_{1i}$ | $Y_{ij} = \gamma_{00} + \sum_{k=1}^8 \gamma_{0k}Z_{ik} + \gamma_{10} + \sum_{k=1}^{10} \gamma_{1k}Z_{ik}Age_{50} + (\zeta_{0i} + \zeta_{1i}Age_{50} + \varepsilon_{ij})$ |

## Web Table 2

---

$$2.1 \quad \pi_{0i} = \gamma_{00} + \sum_{k=1}^8 \gamma_{0k} Z_{ik} + (\zeta_{0i} + \varepsilon_{ij})$$

---

$$2.2 \quad \pi_{1i} = \gamma_{10} + \sum_{k=1}^{10} \gamma_{1k} Z_{ik} + \zeta_{1i}$$

---

$$2.3 \quad Y_{ij} = \pi_{0i} + \pi_{1i} (Age_{50})_l$$

where  $(Age_{50})_l$  is assigned values of -20; -15; -10; -5; and 0.

---



|                                     |                                   |                       |                     |                     |                     |                      |                     |
|-------------------------------------|-----------------------------------|-----------------------|---------------------|---------------------|---------------------|----------------------|---------------------|
| <u>Rate of Change</u><br>$\pi_{1i}$ | Intercept                         | $\gamma_{10}$         | —                   | 0.071***<br>(0.003) | -0.003<br>(0.011)   | 0.009<br>(0.011)     | 0.047***<br>(0.010) |
|                                     | Sex (Female)                      | $\gamma_{12}$         | —                   | —                   | 0.069***<br>(0.008) | 0.066***<br>(0.007)  | 0.030***<br>(0.007) |
|                                     | Education -16 (years)             | $\gamma_{13}$         | —                   | —                   | -0.002~<br>(0.001)  | -0.002~<br>(0.001)   | -0.003*<br>(0.001)  |
|                                     | Former smoker (vs. never smoker)  | $\gamma_{14}$         | —                   | —                   | -0.020**<br>(0.007) | -0.009<br>(0.007)    | -0.006<br>(0.007)   |
|                                     | Current smoker (vs. never smoker) | $\gamma_{15}$         | —                   | —                   | -0.019*<br>(0.008)  | -0.014~<br>(0.008)   | -0.009<br>(0.007)   |
|                                     | NH black vs. NH white             | $\gamma_{16}$         | —                   | —                   | 0.025~<br>(0.015)   | 0.020<br>(0.014)     | -0.019<br>(0.013)   |
|                                     | other race vs. NH white           | $\gamma_{17}$         | —                   | —                   | 0.026<br>(0.031)    | 0.016<br>(0.030)     | -0.022<br>(0.028)   |
|                                     | Age-50 (years)                    | $\gamma_{18}$         | —                   | —                   | —                   | -0.001***<br>(0.000) | -0.000<br>(0.000)   |
|                                     | Year of birth-1920                | $\gamma_{19}$         | —                   | —                   | —                   | —                    | 0.004***<br>(0.000) |
|                                     | (Age-50)*(year of birth-1920)     | $\gamma_{110}$        | —                   | —                   | —                   | —                    | 0.000***<br>(0.000) |
|                                     | <u>Variance components</u>        |                       |                     |                     |                     |                      |                     |
| Level 1                             | Within-person                     | $\sigma^2_{\epsilon}$ | 2.651***<br>(0.030) | 1.189***<br>(0.015) | 1.164***<br>(0.014) | 1.175***<br>(0.015)  | 1.160***<br>(0.014) |

|                                                                       |                   |                 |                      |                      |                      |                      |                      |
|-----------------------------------------------------------------------|-------------------|-----------------|----------------------|----------------------|----------------------|----------------------|----------------------|
| Level 2                                                               | In initial status | $\sigma^2_0$    | 14.850***<br>(0.412) | 16.054***<br>(0.493) | 14.665***<br>(0.491) | 14.760***<br>(0.492) | 13.818***<br>(0.459) |
|                                                                       | In rate of change | $\sigma^2_1$    | —                    | 0.020***<br>(0.001)  | 0.019***<br>(0.001)  | 0.017***<br>(0.001)  | 0.014***<br>(0.001)  |
|                                                                       | Covariance        | $\sigma^2_{01}$ | —                    | 0.069***<br>(0.016)  | 0.101***<br>(0.015)  | 0.082***<br>(0.015)  | 0.037***<br>(0.013)  |
| <u>Pseudo R<sup>2</sup> Statistic and Goodness-of-fit<sup>†</sup></u> |                   |                 |                      |                      |                      |                      |                      |
|                                                                       | $R^2_{y,y}$       |                 | —                    | —                    | -0.46                | -0.19                | 0.46                 |
|                                                                       | $R^2_\epsilon$    |                 | —                    | 0.55                 | 0.02                 | 0.01                 | 0.02                 |
|                                                                       | $R^2_0$           |                 | —                    | -0.08                | 0.09                 | 0.08                 | 0.16                 |
|                                                                       | $R^2_1$           |                 | —                    | —                    | 0.05                 | 0.15                 | 0.30                 |
|                                                                       | Deviance          |                 | 80779.260            | 72005.080            | 67737.700            | 67027.380            | 66455.080            |
|                                                                       | AIC               |                 | 80785.250            | 72017.090            | 67173.710            | 67065.370            | 66899.080            |
|                                                                       | BIC               |                 | 80808.760            | 72064.100            | 67313.880            | 67213.330            | 66670.400            |

---

|                       |                                   |               | WC         |            |            |                |                   |
|-----------------------|-----------------------------------|---------------|------------|------------|------------|----------------|-------------------|
|                       |                                   |               | Model A    | Model B    | Model C    | Model D        | Model E           |
|                       |                                   |               | (n'=14852) | (n'=14852) | (n'=14063) | (n'=14063)     | (n'=14063)        |
| Parameter             |                                   |               |            |            |            | add age-square | add year of birth |
| <b>Fixed Effects</b>  |                                   |               |            |            |            |                |                   |
| <u>Initial status</u> | Intercept                         | $\gamma_{00}$ | 87.714***  | 85.844***  | 103.380*** | 103.508***     | 106.477***        |
| $\pi_{0i}$            |                                   |               | (0.217)    | (0.235)    | (0.768)    | (0.777)        | (0.747)           |
|                       | Sex (Female)                      | $\gamma_{01}$ | —          | —          | -13.217*** | -13.155***     | -15.651***        |
|                       |                                   |               |            |            | (0.467)    | (0.472)        | (0.467)           |
|                       | Education -16 (years)             | $\gamma_{02}$ | —          | —          | -0.088     | -0.104         | -0.110            |
|                       |                                   |               |            |            | (0.083)    | (0.084)        | (0.080)           |
|                       | Former smoker (vs. never smoker)  | $\gamma_{04}$ | —          | —          | -0.332     | -0.535         | -0.272            |
|                       |                                   |               |            |            | (0.492)    | (0.500)        | (0.479)           |
|                       | Current smoker (vs. never smoker) | $\gamma_{05}$ | —          | —          | 0.886      | 0.960~         | 0.763             |
|                       |                                   |               |            |            | (0.536)    | (0.543)        | (0.518)           |
|                       | NH black vs. NH white             | $\gamma_{06}$ | —          | —          | 5.479***   | 5.440***       | 2.204***          |
|                       |                                   |               |            |            | (0.753)    | (0.760)        | (0.730)           |
|                       | other race vs. NH white           | $\gamma_{07}$ | —          | —          | 0.701      | 0.956          | -3.115            |
|                       |                                   |               |            |            | (1.630)    | (1.642)        | (1.554)           |
|                       | Year of birth-1920                | $\gamma_{08}$ | —          | —          | —          | —              | 0.221***          |
|                       |                                   |               |            |            |            |                | (0.013)           |
| <u>Rate of Change</u> | Intercept                         | $\gamma_{10}$ | —          | 0.349***   | 0.167***   | 0.199***       | 0.270***          |



|                            |                                   |                       |                       |                       |                      |                      |                      |
|----------------------------|-----------------------------------|-----------------------|-----------------------|-----------------------|----------------------|----------------------|----------------------|
| $\pi_{1i}$                 |                                   |                       |                       | (0.009)               | (0.030)              | (0.029)              | (0.028)              |
|                            | Sex (Female)                      | $\gamma_{12}$         | —                     | —                     | 0.156***<br>(0.020)  | 0.152***<br>(0.019)  | 0.094***<br>(0.019)  |
|                            | Education -16 (years)             | $\gamma_{13}$         | —                     | —                     | -0.004<br>(0.003)    | -0.004<br>(0.003)    | -0.006*<br>(0.003)   |
|                            | Former smoker (vs. never smoker)  | $\gamma_{14}$         | —                     | —                     | -0.035<br>(0.022)    | -0.007<br>(0.022)    | -0.000<br>(0.021)    |
|                            | Current smoker (vs. never smoker) | $\gamma_{15}$         | —                     | —                     | -0.040~<br>(0.022)   | -0.028<br>(0.022)    | -0.004<br>(0.020)    |
|                            | NH black vs. NH white             | $\gamma_{16}$         | —                     | —                     | 0.045<br>(0.039)     | 0.035<br>(0.039)     | -0.043<br>(0.036)    |
|                            | other race vs. NH white           | $\gamma_{17}$         | —                     | —                     | 0.040<br>(0.079)     | 0.018<br>(0.078)     | -0.047<br>(0.072)    |
|                            | Age-50 (years)                    | $\gamma_{18}$         | —                     | —                     | —                    | -0.002***<br>(0.000) | 0.000<br>(0.000)     |
|                            | Year of birth-1920                | $\gamma_{19}$         | —                     | —                     | —                    | —                    | 0.009***<br>(0.001)  |
|                            | (Age-50)*(year of birth-1920)     | $\gamma_{110}$        | —                     | —                     | —                    | —                    | 0.000***<br>(0.000)  |
| <u>Variance components</u> |                                   |                       |                       |                       |                      |                      |                      |
| Level 1                    | Within-person                     | $\sigma^2_{\epsilon}$ | 34.166***<br>(0.440)  | 19.033***<br>(0.269)  | 18.343***<br>(0.261) | 18.383***<br>(0.262) | 18.163***<br>(0.257) |
| Level 2                    | In initial status                 | $\sigma^2_0$          | 122.928***<br>(3.584) | 125.661***<br>(4.101) | 89.574***<br>(3.272) | 92.091***<br>(3.392) | 81.268***<br>(2.946) |

|                                                                       |                 |            |                     |                     |                     |                     |
|-----------------------------------------------------------------------|-----------------|------------|---------------------|---------------------|---------------------|---------------------|
| In rate of change                                                     | $\sigma^2_1$    | —          | 0.100***<br>(0.006) | 0.091***<br>(0.005) | 0.081***<br>(0.005) | 0.062***<br>(0.003) |
| Covariance                                                            | $\sigma^2_{01}$ | —          | 0.069***<br>(0.116) | 0.609***<br>(0.098) | 0.391***<br>(0.101) | 0.173***<br>(0.085) |
| <u>Pseudo R<sup>2</sup> Statistic and Goodness-of-fit<sup>†</sup></u> |                 |            |                     |                     |                     |                     |
| R <sup>2</sup> <sub>y,y</sub>                                         |                 | —          | —                   | -7.83               | -4.67               | -1.51               |
| R <sup>2</sup> <sub>ε</sub>                                           |                 | —          | 0.44                | 0.04                | 0.03                | 0.05                |
| R <sup>2</sup> <sub>0</sub>                                           |                 | —          | -0.02               | 0.29                | 0.27                | 0.35                |
| R <sup>2</sup> <sub>1</sub>                                           |                 | —          | —                   | 0.09                | 0.19                | 0.38                |
| Deviance                                                              |                 | 102222.040 | 97099.280           | 90200.280           | 90139.560           | 89479.06            |
| AIC                                                                   |                 | 102228.000 | 97111.290           | 90236.280           | 90177.570           | 89523.060           |
| BIC                                                                   |                 | 102250.000 | 97156.920           | 90372.210           | 90321.040           | 89689.190           |

~p<0.10; \*p<0.05; \*\*p<0.01; \*\*\*p<0.001

These models predict BMI for the whole age range in the BLSA data (17-132 years) as a function of AGE-50 (at level-1) and various combinations of fixed and time-dependent variables (sex, education, smoking status and race/ethnicity). All models were fitted using maximum likelihood estimation and unstructured covariance matrix.

<sup>†</sup> For Pseudo-R<sup>2</sup> statistics: Model B was compared to Model A. Subsequent models were compared to model B.
